# Supplementary material for: Inhibition of Pannexin 1 Reduces the Tumorigenic Properties of Human Melanoma Cells
Source: Cancers (Basel). 2019 Jan 16;11(1):102. doi: 10.3390/cancers11010102 (PMC6356688; doi:10.3390/cancers11010102)
Supplement: Supplementary file 1 [file cancers-11-00102-s001.pdf]

# Inhibition of Pannexin 1 Reduces the Tumorigenic Properties of Human Melanoma Cells

Taylor J. Freeman, Samar Sayedyahosseini, Danielle Johnston, Rafael E. Sanchez-Pupo, Brooke O'Donnell, Kenneth Huang, Zameena Lakhani, Daniel Nouri-Nejad, Kevin J. Barr, Luke Harland, Steven Latosinsky, Aaron Grant, Lina Dagnino and Silvia Penuela

## Supplementary Material

### Primary Melanoma Tumors

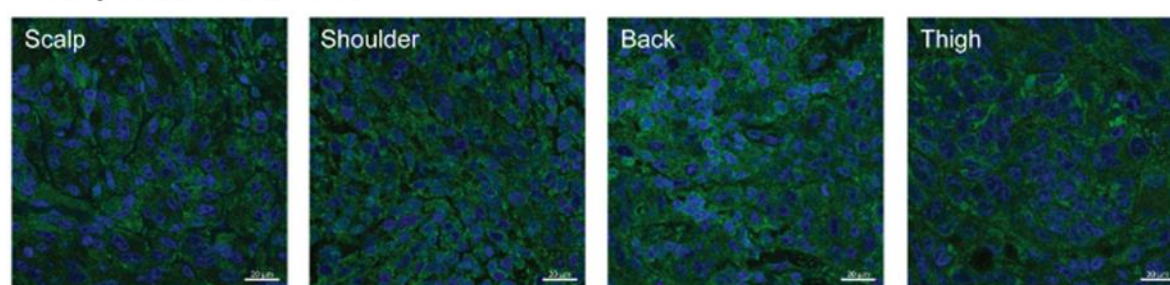

### Nodal Melanoma Metastases

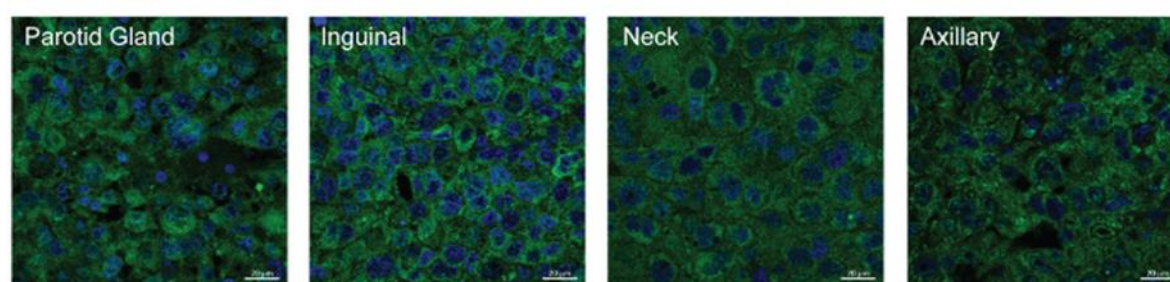

### Distant Melanoma Metastases

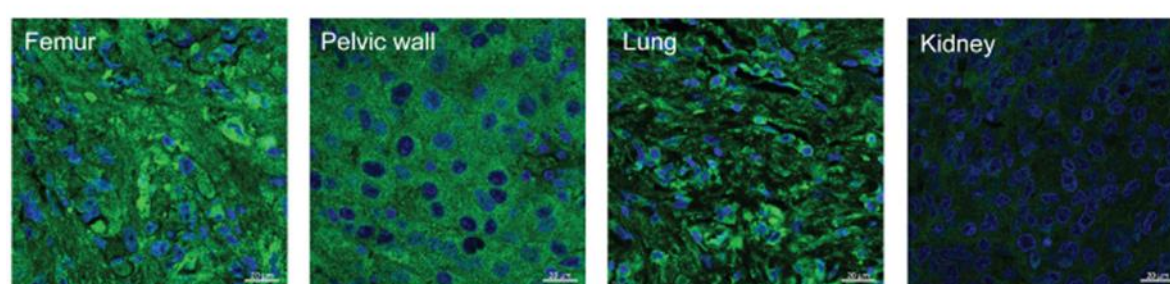

**Supplementary Figure 1.** Immunofluorescence of PANX1 expression in representative patient-derived primary melanoma tumors, nodal and distant melanoma sections from different tumor locations provided by OICR. Each panel represents a different patient. PANX1: green, Hoechst: blue; Scale: 20 µm.

A

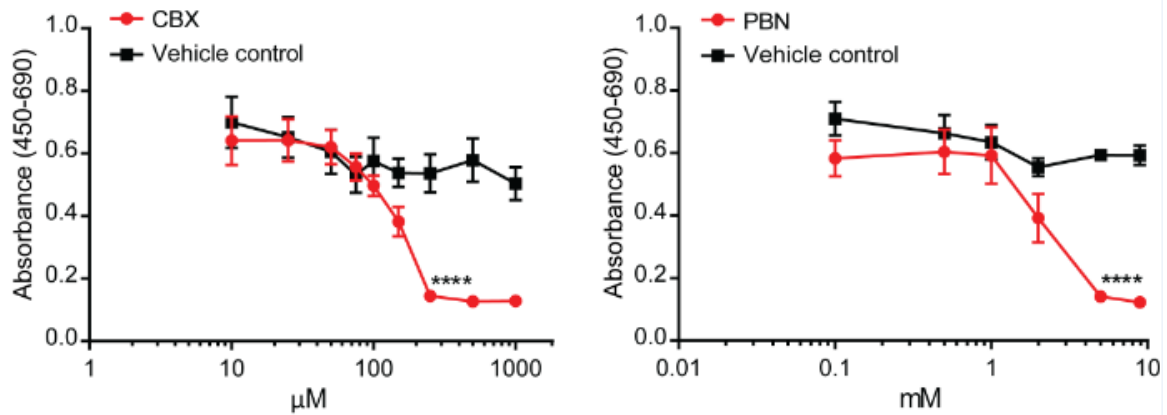

B

### A375-MA2

| Condition             | Doubling Time (hours $\pm$ SD) |
|-----------------------|--------------------------------|
| Vehicle Control (CBX) | 18.05 $\pm$ 0.24               |
| 100 $\mu\text{M}$ CBX | 19.05 $\pm$ 0.34               |
| Vehicle Control (PBN) | 19.10 $\pm$ 0.21               |
| 1mM PBN               | 22.91 $\pm$ 0.54               |

**Supplementary Figure 2.** (A) A WST-1 cytotoxicity assay was used to assess A375-MA2 cell viability when CBX or PBN is applied. Cytotoxic effects do not occur at 100 $\mu\text{M}$  CBX and 1mM PBN indicating that results from *in vitro* and *in vivo* experimental assays are due to channel blockade rather than a decrease in cell viability. Significant cytotoxic effects occur at 250 $\mu\text{M}$  CBX or 5mM PBN in A375-MA2 melanoma cells. Statistical analyses for WST-1 assays were performed using a two-way ANOVA with multiple comparisons followed by a Sidak test. (B) Doubling times of A375-MA2 cells increased when 100 $\mu\text{M}$  CBX (N = 4, n = 12) or 1mM PBN (N = 3, n = 9) was applied to cells in comparison to vehicle control. Data for doubling time was derived from the curves in Figure 2A using a nonlinear regression for exponential growth. \*\*\*\*  $p < 0.0001$ ; Bars indicate S.E.M.
